# Supplementary material
Source: Royal Society of Chemistry journal article supplement (https://www.rsc.org/suppdata/cc/1999/1993/905241k.doc)
Supplement: Supplementary file 1 [file 905241k.doc]

Caption: An ORTEP view of **3** showing the atom labelling scheme. The hydrogen atoms and phenyl carbon atoms except for *ipso*-C have been removed for clarity and the remaining atoms are represented by Gaussian ellipsoids at the 20% probability level. Selected interatomic distances (Å) and angles (º) are: Cr(1)-C(1) = 2.169(3), Cr(2)-C(1) = 2.171(3), Cr(1)-N(1) = 2.044(3), Cr(2)-N(2) = 2.069(3), Cr(1)-Cr(2) = 2.9425(8), N(1)-P(1) = 1.603(3), P(1)-C(1) = 1.722(3), P(2)-C(1) = 1.716(3), P(2)-N(2) = 1.602(3), Cr(1)-C(1)-Cr(2) = 85.4(1), N(1)-Cr(1)-C(1) = 76.0(1), N(2)-Cr(2)-C(1) = 75.3(1), P(1)-C(1)-P(2) = 131.4(2), N(1)-P(1)-C(1) = 102.6(2).

*Crystal data* for **3**: triclinic, *P* (no. 2), *a* = 14.0224(9), *b* = 14.1408(9), *c* =14.5492(9) Å, ** = 70.5666(12), ** = 73.8327(11), ** = 63.7564(11)º, ** = 0.769 mm-1, *V* = 2410.60(3) Å3, *Z* = 1. The structure was solved by direct methods and refined by full matrix least squares procedures: *R*1 **=** 0.0511 and *wR*2 =0.1554 for 9080 reflections with *F*o2>2**(*F*o2) and all data respectively. CCDC 182/1397.
